# Supplementary material
Source: publisher figshare collection journal article supplement (https://acs.figshare.com/ndownloader/files/23659217)
Supplement: Supplementary file 1 [file 23659217]

# Impact of Quantum Chemistry Parameter Choices and Cluster Distribution Model Settings on Modeled Atmospheric Particle Formation Rates

Vitus Besel<sup>1</sup>, Jakub Kubečka<sup>1</sup>, Theo Kurtén<sup>2</sup>, and Hanna Vehkamäki<sup>1</sup>

<sup>1</sup>*Institute of Atmospheric and Earth System Research, University of Helsinki, Physicum, Gustaf Hållströmin Katu 2, 00560 Helsinki*

<sup>2</sup>*Institute of Atmospheric and Earth System Research, University of Helsinki, Physicum, Gustaf Hållströmin Katu 2, 00560 Helsinki*

## Supporting Information

The SI contains this document with two actual  $\Delta G$  surfaces (*cf.* Fig. S1 and S2), the global minima that change for lower temperature (*cf.* Fig. S3) and Fig. S4 with the outgrowing cluster choice if it was solely made based on Eq. 7. Accompanying files contain a table with the DLPNO-CCSD(T) single point electronic energies, the zero-point vibrational correction, the thermal correction to the Gibbs energy, the dipoles and the polarizabilities. Additionally all Orca .out files, .xyz files and a reduced version of the Gaussian .log files are given. In filenames as well as in cluster names in the table the ending "\_qh" shows that the specified cluster is only the global minimum after the application of the quasi-harmonic correction. The files are put into three folders: "neutral", "negative" and "positive". The "ACDC" folder contains the general "INPUT.inp" file and the "INPUT\_ACDB.inp" prepared for the comparison with the ACDB data. The subdirectory "HS\_files" contains all other files used for ACDC named as shown in Tab. S1.

Table S1: File naming for the ACDC input files.

| file name                               | content                                                                                                                                                                        |
|-----------------------------------------|--------------------------------------------------------------------------------------------------------------------------------------------------------------------------------|
| dipoles_YesQuasiHCorr.txt               | Contains the dipoles and polarizabilities for all global minima calculated with quasi-harmonic correction.                                                                     |
| dipoles_NoQuasiHCorr.txt                | Contains the dipoles and polarizabilities for all global minima calculated without quasi-harmonic correction.                                                                  |
| dipoles_ACDB.txt                        | Contains the dipoles and polarizabilities for all global minima from the ACDB.                                                                                                 |
| HS_YesSymYesQuasiHCorr.txt              | Enthalpies [kcal/mol] and entropies [cal/mol*K] for global minima considering monomer symmetry and quasi-harmonic correction.                                                  |
| HS_YesSymNoQuasiHCorr.txt               | Enthalpies [kcal/mol] and entropies [cal/mol*K] for global minima considering monomer symmetry, but not quasi-harmonic correction.                                             |
| HS_NoSymYesQuasiHCorr.txt               | Enthalpies [kcal/mol] and entropies [cal/mol*K] for global minima considering no monomer symmetry, but considering quasi-harmonic correction.                                  |
| HS_CompareToACDB.txt                    | Enthalpies [kcal/mol] and entropies [cal/mol*K] for global minima to be compared to ACDB.                                                                                      |
| HS_ACDB.txt                             | Enthalpies [kcal/mol] and entropies [cal/mol*K] for recalculated global minima taken from ACDB.                                                                                |
| HS_YesSymYesQuasiHCorr.CLUSTERSYM.T.txt | Enthalpies [kcal/mol] and entropies [cal/mol*K] for global minima considering monomer symmetry, cluster symmetry and quasi-harmonic correction. T is the temperature times 10. |

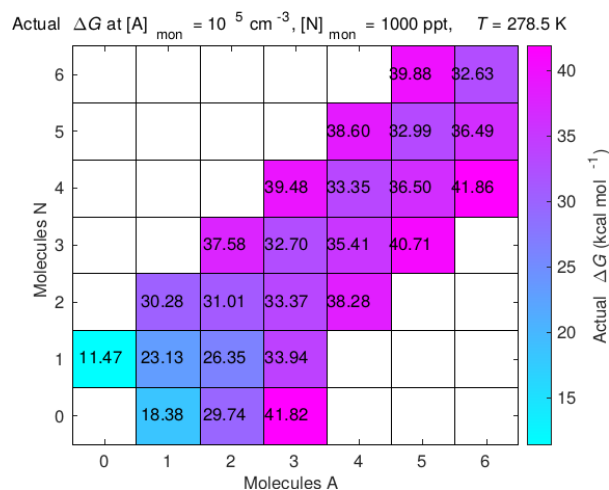

(a) neutral mode

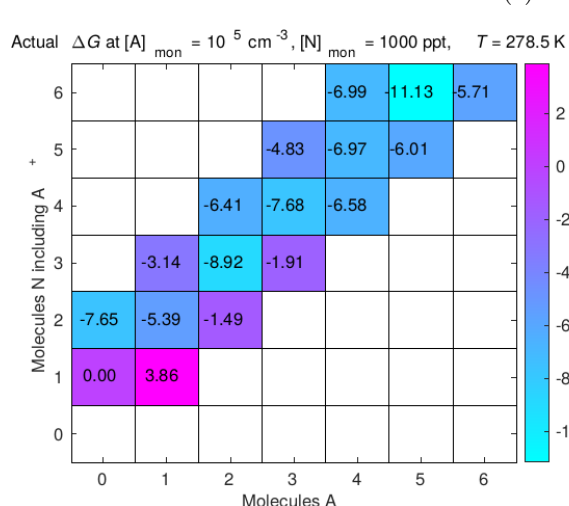

(b) positive mode

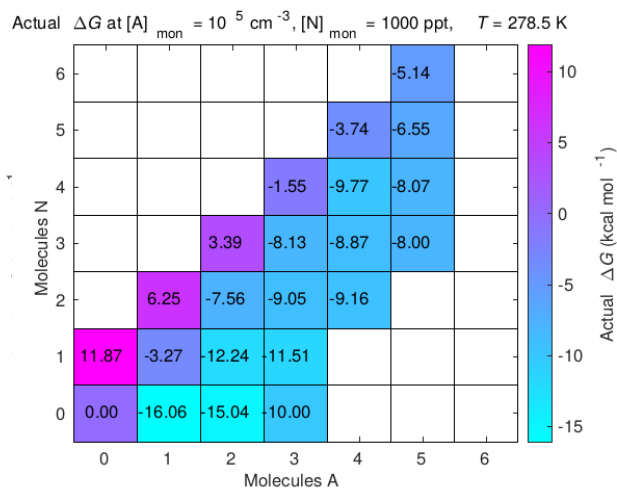

All clusters contain also 1 B

(c) negative mode

Figure S1: A typical actual  $\Delta G$  surface.  $[A]_{\text{mon}}$  is the concentration of sulfuric acid monomers,  $[N]_{\text{mon}}$  the concentration of ammonia monomers and B is bisulfate. Neutral mode depicts the saddle point shape. The critical cluster is the 4 sulfuric acid - 4 ammonia cluster. In charged modes most actual  $\Delta G$ s are negative.

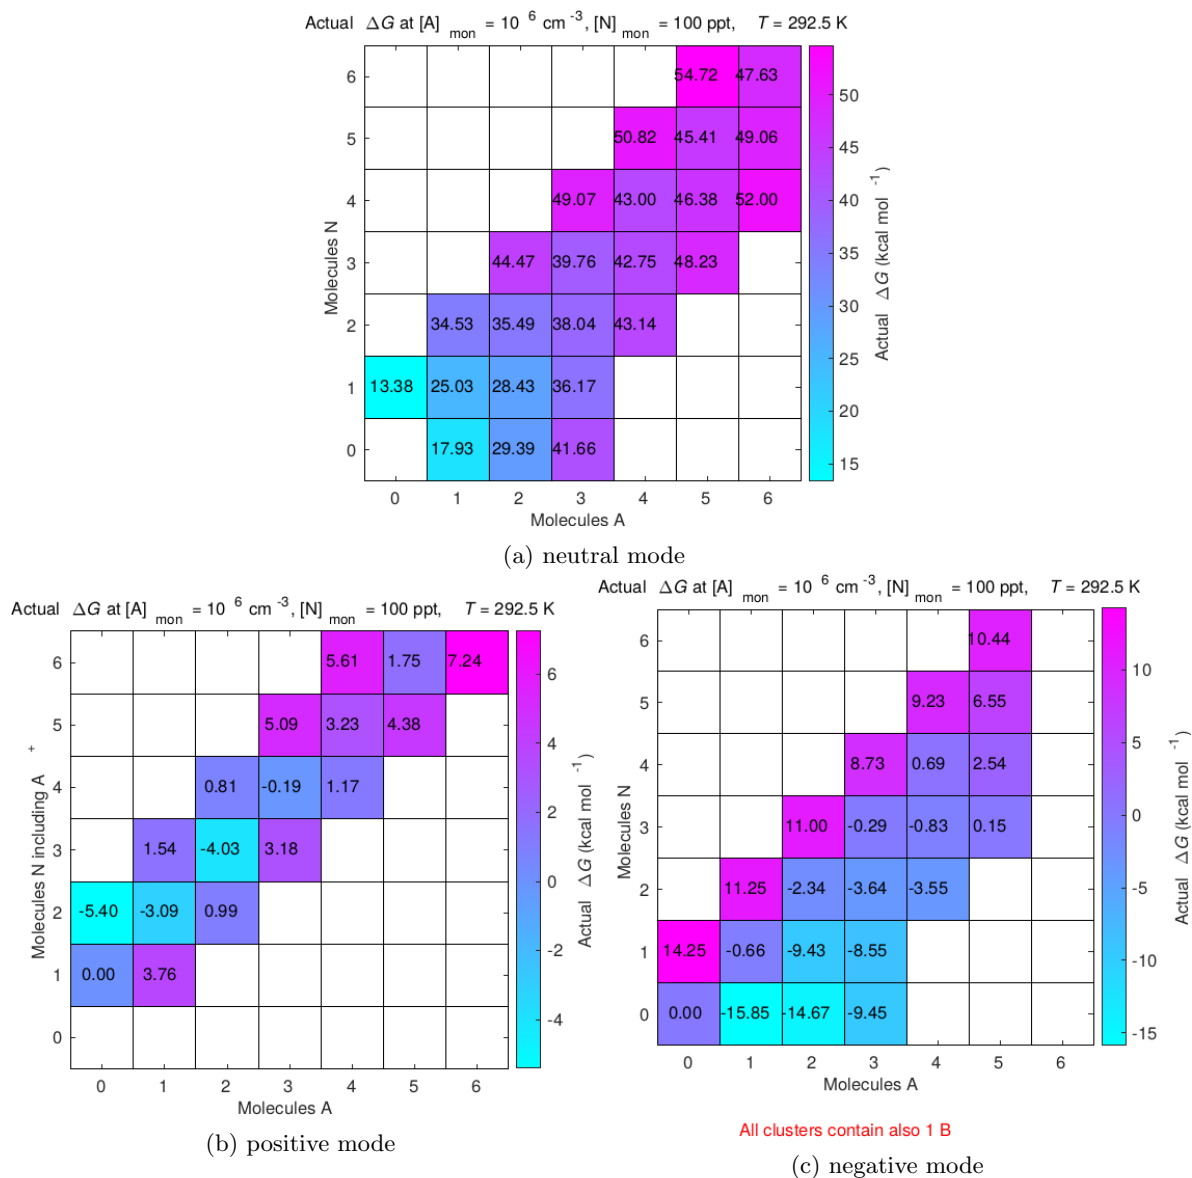

Figure S2: The actual  $\Delta G$  surface for high temperature and low monomer concentrations.  $[A]_{\text{mon}}$  is the concentration of sulfuric acid monomers,  $[N]_{\text{mon}}$  the concentration of ammonia monomers and B is bisulfate. In neutral mode the actual  $\Delta G$  continuously rises, there is no critical cluster. Even in charged mode actual  $\Delta G$ s rise and even reach positive values.

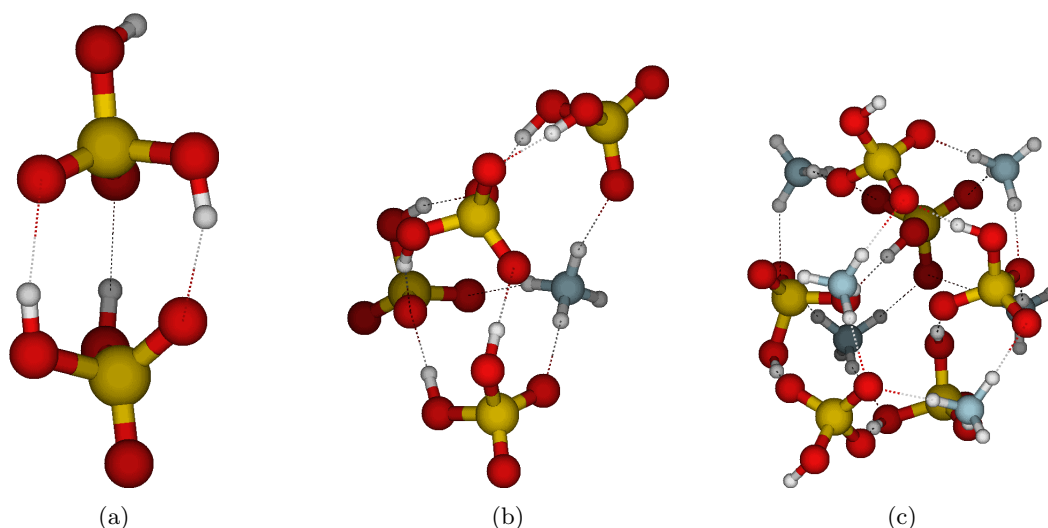

Figure S3: The three molecular clusters that are the actual global minimum once temperature is 248.4 K or lower. The energy differences relative to the used cluster structures at 248.4 K are -0.02 kcal/mol for cluster a,  $(\text{H}_2\text{SO}_4)_2$ , -0.06 kcal/mol for cluster b,  $(\text{H}_2\text{SO}_4)_3\text{H}_2\text{SO}_4^-(\text{NH}_3)$ , and, -0.05 kcal/mol for molecule c,  $(\text{H}_2\text{SO}_4)_6(\text{NH}_3)_5\text{NH}_4^+$ .

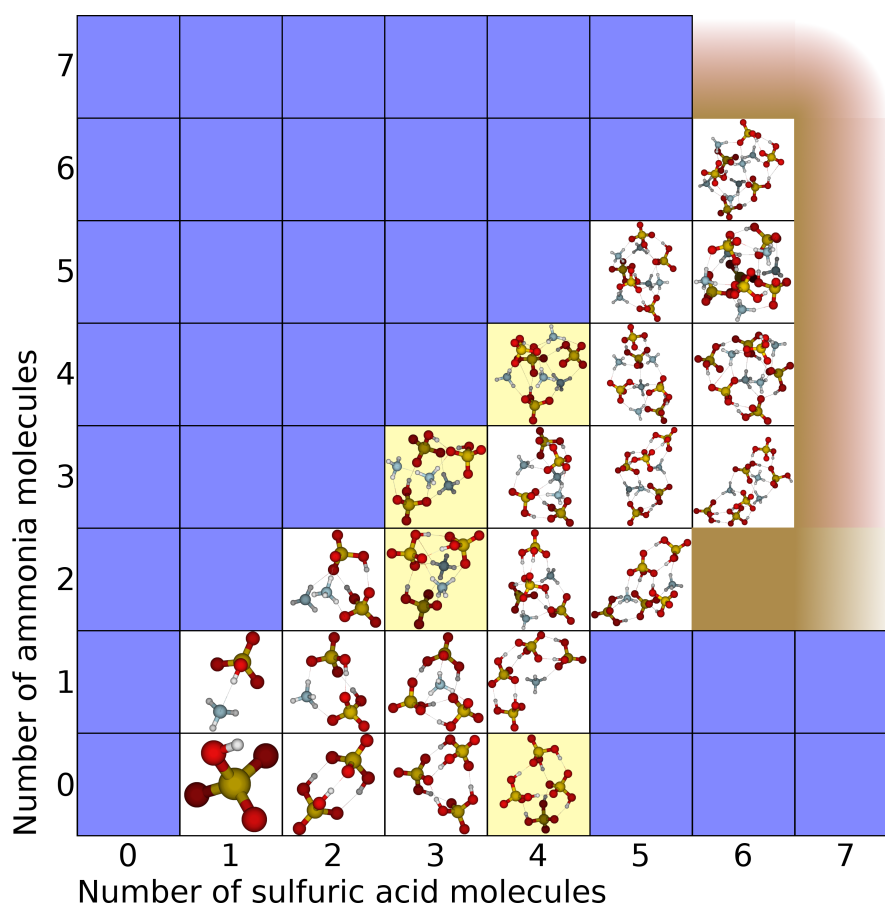

Figure S4: The outgrowing area (brown) of the negative mode clusters if the "pocket" was considered. Considering it lead to a maximum increase of 2.3% at  $T = 223$  K,  $[\text{ammonia}] = 10$  ppt and  $[\text{sulfuric acid}] = 1.6 \cdot 10^6 \text{ cm}^{-3}$  and 0.1% at  $T = 292$  K,  $[\text{ammonia}] = 100$  ppt and  $[\text{sulfuric acid}] = 4.0 \cdot 10^8 \text{ cm}^{-3}$ . For most sulfuric acid concentrations the change is well below 0.01%.
